# Supplementary material for: Nanostructured Lipid Carriers Loaded with Dexamethasone Prevent Inflammatory Responses in Primary Non-Parenchymal Liver Cells
Source: MDPI journal article supplement (doi:10.3390/pharmaceutics14081611), 2022-08-02
Supplement: s1 [file s1]

## Article

# Nanostructured Lipid Carriers Loaded with Dexamethasone Prevent Inflammatory Responses in Primary Non-Parenchymal Liver Cells

Carolina Medina-Montano & Ignacio Rivero Berti et al.

## Supplementary Material

**Table S1.** DXM release kinetics of the different formulations were fitted with different models used for the description of drug release mechanisms (First Order, Higuchi, Korsmeyer-Peppas, and Hixon and Crowell). The release model that best fitted to the experimental data was selected according to the calculations of the coefficient of determination ( $R^2$ ).

| Model Name        | Equation                                    | F1   | F2   | F3   | F4   |
|-------------------|---------------------------------------------|------|------|------|------|
| First Order model | $\log Q_t = \log Q_0 + \frac{k_i t}{2.303}$ | 0.85 | 0.75 | 0.37 | 0.14 |
| Higuchi model     | $Q_t = K_H \sqrt{t}$                        | 0.88 | 0.90 | 0.58 | 0.76 |
| Korsmeyer-Peppas  | $\frac{Q_t}{Q_0} = K_k t^n$                 | 0.93 | 0.95 | 0.82 | 0.90 |
| Hixon and Crowell | $\sqrt[3]{Q_0} - \sqrt[3]{Q_t} = K_s t$     | 0.79 | 0.61 | 0.22 | 0.08 |

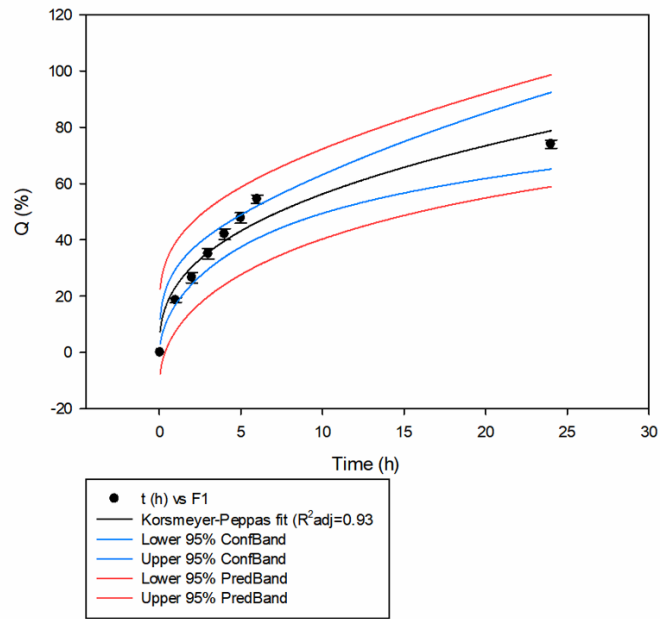

**Figure S1.** DXM release profile from F1. Continuous black line represents Korsmeyer-Peppas model fit. Blue lines correspond to upper and lower 95% confidence intervals and red lines upper and lower 95% prediction intervals.

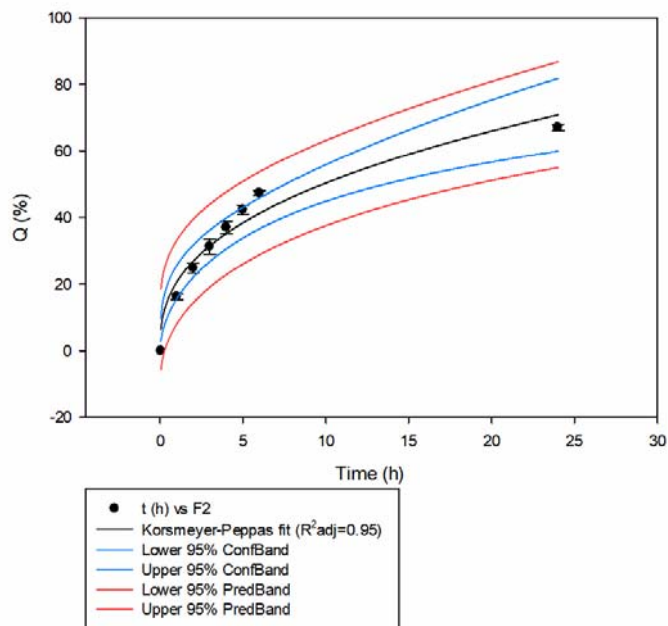

**Figure S2.** DXM release profile from F2. Continuous black line represents Korsmeyer-Peppas model fit. Blue lines correspond to upper and lower 95% confidence intervals and red lines upper and lower 95% prediction intervals.

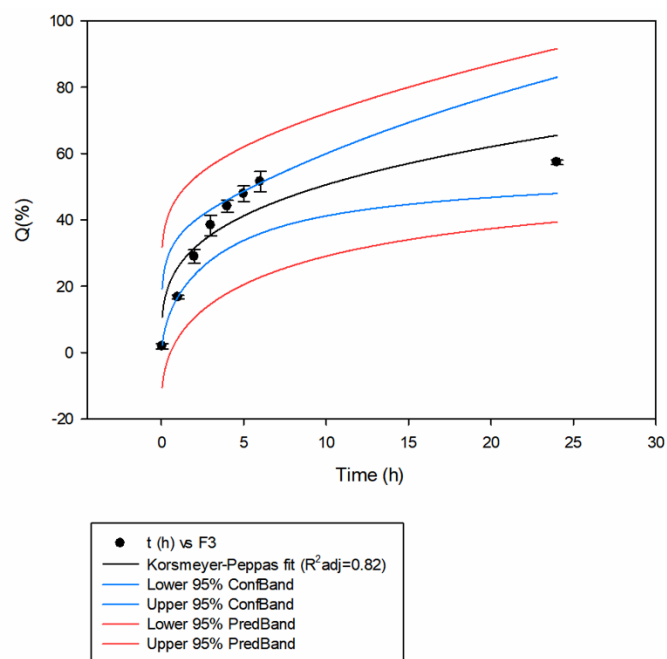

**Figure S3.** DXM release profile from F3. Continuous black line represents Korsmeyer-Peppas model fit. Blue lines correspond to upper and lower 95% confidence intervals and red lines upper and lower 95% prediction intervals.

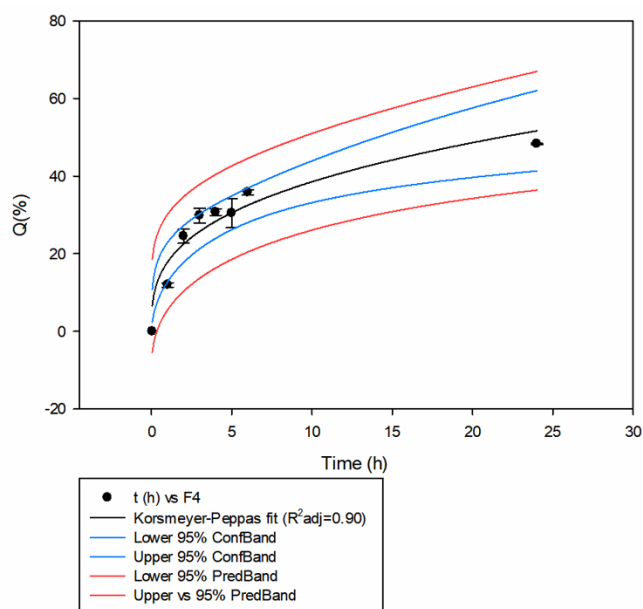

**Figure S4.** DXM release profile from F4. Continuous black line represents Korsmeyer-Peppas model fit. Blue lines correspond to upper and lower 95% confidence intervals and red lines upper and lower 95% prediction intervals.
